# Supplementary material for: Cerebellar Transcriptomic Analysis in a Chronic plus Binge Mouse Model of Alcohol Use Disorder Demonstrates Ethanol-Induced Neuroinflammation and Altered Glial Gene Expression
Source: MDPI journal article supplement (doi:10.3390/cells12050745), 2023-02-25
Supplement: s1 [file s1]

Table S1A. Microglia associated genes [identified in (29-33)].

|               |           |          |         |         |           |               |               |         |               |           |           |
|---------------|-----------|----------|---------|---------|-----------|---------------|---------------|---------|---------------|-----------|-----------|
| 0610040J01RIK | AFTPH     | ARHGDIB  | C1QB    | CD200R1 | CLEC5A    | CXCL10        | DOK3          | EVI2B   | FTL1          | GPR160    | HK2       |
| 1700017B05RIK | AGO4      | ARHGEF6  | C1QC    | CD209F  | CLIC1     | CXCL16        | DRAM1         | F11R    | FYB           | GPR183    | HK3       |
| 1810011H11RIK | AHR       | ARL4C    | C3AR1   | CD209G  | CLIP1     | CXCL2         | DSE           | F13A1   | G530011O06RIK | GPR34     | HMGA2-PS1 |
| 4632428N05RIK | AI607873  | ARPC1B   | C5AR1   | CD2AP   | CLTA      | CYBA          | DSN1          | FAM102B | GAL3ST4       | GPR65     | HMHA1     |
| 4933406I18RIK | AI662270  | ARPC2    | CAMK1   | CD300A  | CLTC      | CYBB          | DTX2          | FAM105A | GALNT12       | GPR84     | HMHA1     |
| 5430427O19RIK | AIF1      | ARRB2    | CAPN3   | CD33    | CMAH      | CYFIP1        | DTX4          | FAM111A | GAS6          | GPX1      | HMOX1     |
| 6230400D17RIK | AIM2      | ARRB2    | CAPZA2  | CD34    | CMTM6     | CYSLTR1       | DUSP1         | FAM134B | GCNT1         | GPX3      | HPGD      |
| 9830001H06RIK | AKAP13    | ARSB     | CASP1   | CD36    | COL27A1   | CYTH4         | DUSP6         | FAM46A  | GDF15         | GRAP      | HPGDS     |
| A630001G21RIK | AKR1B10   | ASAH1    | CASP4   | CD37    | COMMD8    | CYTH4         | E230029C05RIK | FAM46C  | GDI2          | GRN       | HPS3      |
| AB124611      | ALOX5     | ASAP1    | CASP8   | CD48    | COPS4     | D15ERTD621E   | EBI3          | FAM49B  | GDPD3         | GTF2H2    | HPS4      |
| ABCA1         | ALOX5AP   | ASPH     | CASS4   | CD53    | CORO1A    | D17H6S56E-5   | EDEM1         | FAU     | GEM           | GUSB      | HSPA1A    |
| ABCA9         | AMDHD2    | ATF3     | CBFA2T3 | CD68    | COTL1     | D830030K20RIK | EDEM2         | FBXW4   | GINS2         | H2-AA     | HSPA1B    |
| ABCB1B        | ANG       | ATF4     | CBR2    | CD82    | CRADD     | DAB2          | EFHD2         | FCER1G  | GIT2          | H2-D1     | HSPA5     |
| ABCC3         | ANGPTL7   | AXL      | CCDC50  | CD83    | CREG1     | DAGLB         | EGR1          | FCGR1   | GM10336       | H2-DMB1   | HSPB1     |
| ABCD2         | ANXA3     | B2M      | CCDC86  | CD84    | CRYL1     | DAZAP2        | EGR2          | FCGR2B  | GM13139       | H2-K1     | HVCN1     |
| ABHD12        | AP1B1     | BAZ1A    | CCDC88B | CD86    | CSF1R     | DCLRE1C       | EHBP1L1       | FCGR3   | GM13476       | H2-Q10    | ICAM1     |
| ABHD15        | APAF1     | BC035044 | CCDC9   | CDKN1A  | CSF2RB    | DDX26B        | EHD1          | FCNA    | GM14548       | H2-Q2     | IER2      |
| ABI3          | APBB1IP   | BCL2A1B  | CCL12   | CEBPA   | CSF3R     | DDX3X         | EHD4          | FCRLS   | GM20605       | H2-T23    | IER3      |
| ABL1          | APH1C     | BCL2A1C  | CCL2    | CEBPB   | CSK       | DDX5          | EIF5          | FERMT3  | GM2382        | H3F3B     | IER5      |
| ACP2          | APOBEC1   | BHLHE41  | CCL24   | CENPF   | CSRNP1    | DENND1B       | ELF1          | FEZ2    | GM3002        | H60C      | IFFO1     |
| ACP5          | APOBEC3   | BID      | CCL3    | CEP110  | CST3      | DENND1C       | ELK3          | FGD2    | GM5086        | HAVCR2    | IFI202B   |
| ACVR1         | APOC1     | BIN1     | CCL4    | CERK    | CTSA      | DENND4A       | ELMO1         | FMNL1   | GM6377        | HCK       | IFI203    |
| ADA           | ARAP3     | BIN2     | CCL6    | CFH     | CTSB      | DHDH          | ELMSAN1       | FMNL3   | GM8615        | HCLS1     | IFI204    |
| ADAM10        | ARHGAP11A | BLNK     | CCL7    | CFHR2   | CTSC      | DHRS3         | EML3          | FMO5    | GMFG          | HERC2     | IFI27L2A  |
| ADAM15        | ARHGAP17  | BLVRA    | CCL9    | CFP     | CTSD      | DIAP2         | EMR1          | FNDC3A  | GNG10         | HERPUD1   | IFNAR2    |
| ADAM17        | ARHGAP19  | BLVRB    | CCNL1   | CH25H   | CTSH      | DNAJB1        | ENG           | FNIP2   | GNGT2         | HEXA      | IFNGR1    |
| ADAM33        | ARHGAP25  | BMP2     | CCR1    | CITED2  | CTSL      | DNAJB4        | ENTPD1        | FOLR2   | GNPDA1        | HEXB      | IFNGR2    |
| ADAMTS1       | ARHGAP27  | BRD2     | CCR5    | CLCN5   | CTSS      | DNASE2A       | EPB41L2       | FOS     | GNS           | HFE       | IFRD1     |
| ADAP2         | ARHGAP30  | BTG1     | CCRL2   | CLEC10A | CTSZ      | DNM2          | EPSTI1        | FOSB    | GOLM1         | HHEX      | IGSF6     |
| ADCY7         | ARHGAP39  | BTG2     | CD14    | CLEC4A2 | CTTNBP2NL | DOCK10        | ERP29         | FRMD4A  | GP49A         | HIST1H2AE | IKZF1     |
| ADRB2         | ARHGAP4   | BTK      | CD163   | CLEC4A3 | CX3CR1    | DOCK2         | ETHE1         | FRRS1   | GPNMB         | HIST1H3I  | IL10RA    |
| AF251705      | ARHGAP5   | C1QA     | CD164   | CLEC4N  | CXCL1     | DOCK8         | EVI2A         | FSCN1   | GPR155        | HIST2H2BB | IL16      |

|          |          |          |          |         |          |          |           |          |         |         |           |          |         |
|----------|----------|----------|----------|---------|----------|----------|-----------|----------|---------|---------|-----------|----------|---------|
| IL17RA   | KLF6     | LY96     | MILR1    | NCKAP1L | P2RX7    | PLOD3    | PYCARD    | RNF19B   | SH2B2   | SNX2    | TBXAS1    | TNFRSF21 | VCAN    |
| IL18BP   | KLHL6    | LYL1     | MIR1903  | NCKAP5L | P2RY12   | PLXDC2   | PYROXD2   | RNF19B   | SH2B3   | SNX5    | TCIRG1    | TNFSF9   | WDFY4   |
| IL1A     | KRCC1    | LYN      | MIR692-1 | NCOA3   | P2RY13   | PMEP A1  | RAB11FIP5 | RNU12    | SH3BP1  | SOCS3   | TCN2      | TOR1AIP1 | WFDC17  |
| IL1B     | LAIR1    | LYVE1    | MKI67    | NDST2   | P2RY6    | PMF1     | RAB32     | RP2H     | SH3GLB1 | SP110   | TFEC      | TPM3     | WSB1    |
| IL4RA    | LAPTM5   | LYZ1     | MKNK1    | NEK6    | PACSIN2  | PMP22    | RAB39     | RPL35A   | SHCBP1  | SPARC   | TGFBI     | TPP1     | WWP1    |
| IL6RA    | LAT2     | LYZ2     | MLEC     | NEURL3  | PAG1     | PNP      | RAB3IL1   | RPLP1    | SIGLECH | SPI1    | TGFB R1   | TREM2    | XBP1    |
| IL6ST    | LCP1     | MAF      | MLXIPL   | NFAM1   | PALD1    | PNRC1    | RAB43     | RPS6KA1  | SIPA1   | SPIDR   | TGFB R2   | TRIB1    | XLR     |
| IL7R     | LCP2     | MAFB     | MLXIPL   | NFATC2  | PAOX     | POLA1    | RAB8B     | RRBP1    | SIRPA   | SPP1    | TGIF1     | TRIM21   | YWHAH   |
| INPP5D   | LEPREL1  | MAFF     | MNDA     | NFE2L2  | PARVG    | POU2F2   | RAC2      | RRP1B    | SKAP2   | SPTY2D1 | TIFAB     | TRIM47   | ZC3H12C |
| IRAK4    | LGALS3BP | MAML1    | MOCOS    | NFKB1   | PCF11    | PPCDC    | RAD51AP1  | RTN4RL1  | SKI     | SRGAP2  | TIMP2     | TSC22D3  | ZCCHC2  |
| IRF1     | LGALS9   | MAN1C1   | MORC3    | NFKBIA  | PDE3B    | PPFIA4   | RAP1B     | SALL1    | SKIL    | SRGAP2  | TLN1      | TSLP     | ZFAND5  |
| IRF2BPL  | LGMN     | MAN2B1   | MPEG1    | NFKBID  | PDGFB    | PPP1R15A | RAP1GDS1  | SALL3    | SLA     | SRGN    | TLN2      | TSPAN14  | ZFHX3   |
| IRF5     | LHFPL2   | MAP2K1   | MPP1     | NFKBIZ  | PF4      | PPP1R18  | RASGRP3   | SAMSN1   | SLAMF9  | SRSF5   | TLR13     | TSPO     | ZFP110  |
| IRF7     | LILRA5   | MAP3K14  | MRC1     | NFXL1   | PHF15    | PRCP     | RBPJ      | SASH3    | SLC11A1 | SSH2    | TLR2      | TUBA1C   | ZFP36   |
| IRF8     | LILRB4   | MAP3K8   | MS4A6B   | NHLRC3  | PHYHD1   | PRKAB1   | RCAN1     | SAT1     | SLC15A3 | ST3GAL5 | TLR3      | TUBB6    | ZFP36L1 |
| ISYNA1   | LIMD2    | MAPK14   | MS4A6C   | NINJ1   | PICALM   | PRKCD    | RCBTB2    | SBNO2    | SLC16A6 | ST3GAL6 | TLR7      | TUBGCP5  | ZFP36L2 |
| ITGAM    | LIMS1    | MAPKAPK2 | MS4A6D   | NLRP3   | PIK3CD   | PROS1    | REL       | SCAMP2   | SLC25A5 | STAB1   | TMCO4     | TUFT1    | ZFP467  |
| ITGB2    | LMO2     | MARCKS   | MS4A7    | NMT1    | PIK3CG   | PRPSAP2  | RENB P    | SCEL     | SLC29A3 | STAB1   | TMEM106A  | TXNIP    | ZFP568  |
| ITGB5    | LPAR6    | MASP2    | MSN      | NNT     | PIK3R5   | PSAP     | RGL2      | SCOC     | SLC2A5  | STAG3   | TMEM119   | TYMS     | ZFP710  |
| ITM2B    | LPCAT2   | MB21D1   | MSR1     | NPL     | PIP4K2A  | PSMB8    | RGS1      | SCPEP1   | SLC37A2 | STARD3  | TMEM173   | TYROBP   | ZFP90   |
| ITSN1    | LPCAT3   | MBNL1    | MTDH     | NRP1    | PIRA4    | PTAFR    | RGS10     | SELPLG   | SLC38A6 | STK10   | TMEM55B   | UAP1L1   | ZSWIM6  |
| IVNS1ABP | LPIN2    | MCFD2    | MTR      | NRROS   | PIRB     | PTBP1    | RGS19     | SEMA4D   | SLC7A7  | STK3    | TMEM63A   | UBASH3B  | ZYX     |
| JAK1     | LPL      | MCL1     | MTUS1    | NTPCR   | PISD-PS3 | PTBP3    | RGS2      | SEPP1    | SLC7A8  | SUSD1   | TMEM64    | UBC      |         |
| JMJD1C   | LPXN     | MEF2A    | MYD88    | NUAK2   | PKN1     | PTGS1    | RGS3      | SERINC3  | SLC9A9  | SUSD3   | TMEM8     | UBE2J1   |         |
| JUN      | LRBA     | MEF2C    | MYLIP    | NUMB    | PLA2G15  | PTP4A3   | RHOB      | SERPINB8 | SLCO2B1 | SYK     | TMEM86A   | UCP2     |         |
| JUNB     | LRMP     | MERTK    | MYO1F    | OAS2    | PLA2G4A  | PTPLAD2  | RHOG      | SERPINF1 | SLFN2   | SYNGR2  | TMSB4X    | UGT1A2   |         |
| JUND     | LRP6     | METTL20  | MYO1F    | OGFRL1  | PLAGL2   | PTPN1    | RHOH      | SFPI1    | SLMAP   | TAB2    | TNF       | UGT1A7C  |         |
| KCTD12   | LRRC3    | MFAP3    | NAGPA    | OLFML3  | PLAU     | PTPN18   | RILPL2    | SFT2D1   | SMAD3   | TAGAP   | TNFAIP3   | UNC93B1  |         |
| KDM2B    | LST1     | MFSD1    | NAIP5    | ORAI1   | PLCG2    | PTPN6    | RIN2      | SFT2D2   | SMAD7   | TAGAP1  | TNFAIP8   | USP2     |         |
| KHK      | LTC4S    | MGAT1    | NCF1     | OSBPL11 | PLCL2    | PTPRC    | RNASE4    | SGK1     | SMAP2   | TANC2   | TNFAIP8L2 | VAMP3    |         |
| KLF2     | LY6E     | MGAT4A   | NCF2     | OTUD1   | PLD4     | PTPRJ    | RNASEL    | SGPL1    | SNORD17 | TAPBP   | TNFRSF1A  | VASP     |         |
| KLF4     | LY86     | MGL2     | NCF4     | P2RX4   | PLEK     | PXN      | RNF130    | SGSH     | SNX18   | TBC1D16 | TNFRSF1B  | VAV1     |         |

Table S1B. Microglia homeostatic genes [identified in (35 and 37)].

| Homeostatic |                |         |
|-------------|----------------|---------|
| ABCC3       | IL10RB         | SCAMP5  |
| ABI3        | IL21R          | SERINC3 |
| ADGRG1      | INPP4B         | SIGLECH |
| ARHGAP5     | ITGA6          | SLC2A5  |
| ATP8A2      | JUN            | SLCO2B1 |
| BASP1       | KCTD12         | SMAD3   |
| BIN1        | LAIR1          | ST3GAL6 |
| CCR5        | LRRC3          | TGFB1   |
| CD33        | LTC4S          | TGFBR1  |
| CKB         | MAFB           | TGFBR2  |
| CMKLR1      | MEF2A          | TJP1    |
| CRYBB1      | MERTK          | TMEM119 |
| CSF1R       | NFKB1          | USP2    |
| CST3        | NR3C1          | X99384  |
| CTTNBP2NL   | NRIP1          |         |
| CX3CR1      | NUAK1          |         |
| CXXC5       | OLFML3         |         |
| EGR1        | OPHN1          |         |
| F11R        | P2RY12         |         |
| FCRL5       | P2RY13         |         |
| FGD2        | PDE3B          |         |
| FSCN1       | PLA2G15        |         |
| GLUL        | PLXDC2         |         |
| GOLM1       | PMEPA1         |         |
| GPR34       | PU.1<br>ORSPI1 |         |
| GPR56       | RAB3IL1        |         |
| GTF2H2      | RAP1GDS1       |         |
| HEXB        | RGMB           |         |
| HPGDS       | RHOB           |         |
| IL10RA      | SALL1          |         |

Table S1C. Common microglia genes affected during disease states [identified in (35-37)].

| Neurodegenerative |          |        |
|-------------------|----------|--------|
| ALCAM             | FABP5    | TIMP2  |
| ANK               | FER1L3   | TLR2   |
| APOE              | FTH1     | TREM2  |
| ARG1              | GAS7     | TYROBP |
| AXL               | GNAS     | VEGFA  |
| B2M               | GPNMB    |        |
| BHLHE40           | GPX3     |        |
| CADM1             | GRN      |        |
| CCL2              | GUSB     |        |
| CCL6              | H2-D1    |        |
| CCRL2             | HIF1A    |        |
| CD52              | IFI202B  |        |
| CD63              | IGF1     |        |
| CD68              | IL1B     |        |
| CD9               | ITGAX    |        |
| CFP               | LAG3     |        |
| CHI3L3            | LGALS3   |        |
| CLEC7A            | LILRB4   |        |
| CSF1              | LIRB4    |        |
| CST7              | LPL      |        |
| CSTB              | LYZ2     |        |
| CTSA              | MIF      |        |
| CTSB              | MIR155   |        |
| CTSD              | MSR1     |        |
| CTSL              | NOS2     |        |
| CTSZ              | SERINC3  |        |
| CXCL10            | SERPINE2 |        |
| CXCL16            | SIGLEC1  |        |
| CXCR4             | SPP1     |        |
| CYBB              | TFEC     |        |

Table S2. Categorized astrocyte associated genes [identified in (76)].

| Acute Injury |         |           |          |         |          |         | Pan-Injury |          |          | Chronic Neurodegenerative Diseases |          |
|--------------|---------|-----------|----------|---------|----------|---------|------------|----------|----------|------------------------------------|----------|
| ADIPOR1      | REXO2   | GABARAP   | PSMD9    | ABR     | VCL      | TBL1X   | GFAP       | GAP43    | STAT2    | CAPN3                              | SEN8     |
| ATP11A       | RNF4    | GABPA     | RALB     | ACVR2B  | VEGFB    | THSD7A  | CSF1       | LAPTM5   | ZNFX1    | LAMA4                              | SOX2     |
| CD63         | SGPL1   | GALNT2    | RER1     | ANGEL2  | WASF3    | TMEM107 | IFIT3      | LGALS3   | IDI1     | COBL                               | STT3B    |
| CTSA         | SLC41A2 | GBA       | RNF141   | ASF1A   | ARNTL    | TTC39B  | AHNAK      | PSME1    | INSIG1   | ESYT1                              | TMEM229A |
| GFPT2        | TFG     | GSS       | SCAMP4   | BAZ2A   | BRCC3    | YIPF4   | CD44       | ARHGDIB  | RAB30    | KLC1                               | TMEM41B  |
| HAT1         | TMEM65  | HINT1     | SGCB     | CLASP2  | CDCC113  | ZBTB24  | CEBPD      | ATF3     | TIMP3    | PEX5L                              | TOM1L1   |
| MTMR9        | USP14   | IARS      | SLC44A3  | CPSF6   | CDK5     |         | GPNMB      | CDKN1A   | ACSS2    | TSC22D1                            | WDR17    |
| NLN          | XRCC6   | IL33      | SNAP23   | CYR61   | CNBP     |         | STAT3      | CPNE8    | FUT9     | APP                                | ACOT6    |
| PUS7L        | YWHAZ   | IMP4      | SNX10    | FUT8    | DMD      |         | TIMP1      | CTSH     | FZD2     | CYR61                              | DCK      |
| ANKRD49      | ARL4C   | INTS7     | SNX33    | GNAL    | EP300    |         | VIM        | FAS      | HMGCS1   | GATAD2B                            | DR1      |
| ANXA5        | ARRDC4  | IPO5      | SSR3     | GPRASP1 | IRF2     |         | C3         | IFI44    | PPARGC1A | NR4A3                              | INHBB    |
| CCNG1        | AXL     | KARS      | TMEM176B | KALRN   | KLHL3    |         | CH25H      | IFIH1    | PTPRD    | RUSC1                              | NFYC     |
| CCT4         | BCL10   | LAP3      | TMEM206  | LRP1B   | MAPK9    |         | CTSS       | IRF9     | TTPA     | THBS4                              | PATZ1    |
| CDC42        | CALU    | LRRC41    | TOR1AIP2 | LRRK2   | MSRB2    |         | CYB5R3     | LGALS1   | BBOX1    | FAM69C                             | SOD2     |
| CDC42SE1     | CARS    | LRRC58    | TRIM21   | MECP2   | NCDN     |         | GPX1       | LGALS3BP | ELOVL2   | S1PR1                              | TMEM185B |
| DEDD         | CCT2    | LSM4      | UBE2F    | MYCBP2  | NIPBL    |         | HSPB1      | MOBP     | NSDHL    | TRIB2                              |          |
| ESD          | CDK4    | MCFD2     | WDSUB1   | NIT1    | NR2F2    |         | IQGAP1     | NFASC    | AHCYL1   | AGL                                |          |
| FARSB        | CFL1    | MFS1      | YKT6     | NR2C2   | NUMB     |         | MCL1       | RPS4X    | APLN     | ARSK                               |          |
| IBTK         | CHMP7   | MYCBP     | CBX7     | OTUD5   | PIP5K1B  |         | OSMR       | SH3BP2   | ARHGEF9  | CD164                              |          |
| LAMP2        | CPD     | NEDD1     | RORA     | PCM1    | PNPLA8   |         | PARP14     | STK3     | CDH10    | GPR37L1                            |          |
| LGALS8       | CYBRD1  | NIPSNAP3A | CRIM1    | PDGFRB  | PSD2     |         | PARP3      | UCP2     | GLRB     | HEATR3                             |          |
| LRRC59       | DDOST   | NOL11     | HIVEP1   | PPM1B   | PTPRG    |         | RHOC       | DDX58    | SQLE     | IGDCC4                             |          |
| LSG1         | DNAJC14 | OTUD6B    | IGSF1    | PRDM2   | RBM26    |         | RHOJ       | FCER1G   | TLCD1    | KLHL32                             |          |
| LYN          | DNTTIP2 | PEX12     | NCOR1    | PRELP   | RCAN2    |         | SERPING1   | GOLM1    |          | NAA30                              |          |
| NFE2L2       | DPH2    | PIH1D1    | NTRK3    | PYGO1   | RNF44    |         | STAT1      | HAVCR2   |          | PRRX1                              |          |
| OTUD7B       | EEF1E1  | POLD4     | PSPC1    | SAP30L  | RPA3     |         | A2M        | JUNB     |          |                                    |          |
| PLIN2        | EIF2B2  | PPR1R1A   | PTPRN2   | SRPK2   | SLC25A23 |         | ACTB       | NFIL3    |          |                                    |          |
| PRRC1        | EIF2B3  | PPP4C     | STAG2    | SYNE1   | SLC40A1  |         | CEBPB      | PARP9    |          |                                    |          |
| PSMD2        | ENOX2   | PPP6C     | UBR1     | THOC2   | SMARCA2  |         | DST        | PLCE1    |          |                                    |          |
| RELA         | FYN     | PSMD11    | XPA      | TSC22D1 | SSBP3    |         | FLOT1      | PLEK     |          |                                    |          |

Table S3. Categorized oligodendrocyte associated genes [identified in (29, 30, and 38)].

| Oligodendrocyte Progenitor Cell Associated Genes |          |          |         |          |        |         |          |           |          |         |
|--------------------------------------------------|----------|----------|---------|----------|--------|---------|----------|-----------|----------|---------|
| 0610040J01RIK                                    | ASIC1    | CMTM4    | FAM126B | GRIA4    | LRRN1  | NLGN1   | PNMAL2   | SCRG1     | STRN4    | UNC5C   |
| 1700025G04RIK                                    | ASRGL1   | CNTN1    | FAM155A | GRIN3A   | LRRTM1 | NLGN2   | POLG     | SDC3      | SULF2    | USP24   |
| 1810041L15RIK                                    | ASTN1    | COBL     | FAM181B | GRM5     | LRRTM3 | NMNAT2  | POU3F1   | SEMA3D    | SUSD5    | VCAN    |
| 2310044G17RIK                                    | ATCAY    | COL9A3   | FAM19A5 | HES5     | LRRTM4 | NOVA1   | PPAPDC1A | SEMA5A    | SVIL     | VLDLR   |
| 2900011O08RIK                                    | B3GAT1   | CPQ      | FAM212B | HIP1     | LUZP2  | NRCAM   | PPFIBP1  | SEMA5B    | TAGLN2   | WSCD1   |
| 3110035E14RIK                                    | BAI1     | CSMD3    | FAM3C   | HIP1R    | MAGEE1 | NRXN1   | PRKCB    | SEMA6A    | TCEAL1   | ZCCHC24 |
| 3632451O06RIK                                    | BC068157 | CSPG4    | FAM5C   | HSD17B12 | MAGEH1 | NRXN2   | PRKCQ    | SERINC5   | TCEAL3   | ZFP462  |
| 4833424O15RIK                                    | BCAN     | CSPG5    | FAT1    | IFI27L1  | MANEAL | NTRK3   | PTDSS1   | SERPINA3N | TDRD7    | ZFP488  |
| 9530091C08RIK                                    | BMP7     | CSTF2    | FBXO7   | IFIT2    | MAP3K1 | OLIG1   | PTN      | SERPINE2  | TM7SF3   | ZFP945  |
| A730017C20RIK                                    | C1QL1    | CTHRC1   | FCHSD2  | IGFBP7   | MATN4  | OLIG2   | PTPRE    | SH3BP4    | TMCO3    |         |
| A930009A15RIK                                    | C1QL2    | CTNND2   | FIP1L1  | IGSF21   | MDGA2  | OMG     | PTPRG    | SH3D19    | TMEM100  |         |
| ABCG1                                            | C77370   | CXADR    | FRY     | ITGAV    | MEG3   | ORAI1   | PTPRK    | SHC4      | TMEM132B |         |
| ABHD17B                                          | CACNB4   | CYP2J6   | G0S2    | ITPR2    | MEGF11 | OSTF1   | PTPRN    | SLC1A1    | TMEM163  |         |
| ABI2                                             | CADM2    | CYP2J9   | GABRB2  | JAM2     | MFSD2A | P2RX7   | PTPRZ1   | SLC22A15  | TMEM167  |         |
| ABR                                              | CADM4    | DBC1     | GABRB3  | JAM3     | MIDN   | PAK4    | PXDC1    | SLC22A17  | TMEM176A |         |
| ABTB2                                            | CALCRL   | DCAF12L1 | GAD1    | KANK1    | MIF4GD | PAPSS1  | QPCT     | SLC22A23  | TMEM176B |         |
| ACAP3                                            | CALY     | DDAH1    | GALNT13 | KBTBD11  | MMP15  | PCDH10  | RAB31    | SLC35F1   | TMEM179  |         |
| ADAM9                                            | CAR11    | DISP2    | GALNT16 | KCND2    | MMP16  | PCDH11X | RABGAP1L | SLC38A3   | TMEM246  |         |
| ADCYAP1R1                                        | CAR8     | DLGAP1   | GALNT2  | KCND3    | MMP2   | PCDH15  | RAMP1    | SLC7A3    | TMEM255A |         |
| ADORA1                                           | CASK     | DNER     | GAP43   | KCNIP3   | MPPED2 | PCDH17  | RAP1GAP  | SLITRK1   | TMEM255B |         |
| AFAP1L2                                          | CASKIN1  | DNM3     | GGH     | KCNK2    | MPZL1  | PCDH20  | RAPGEF3  | SLITRK2   | TMEM59L  |         |
| AGPAT5                                           | CASKIN2  | DOCK9    | GJC3    | KCNK3    | MRPS7  | PCDH7   | RAPH1    | SMOC1     | TMEM63B  |         |
| A1414108                                         | CAV1     | DPP6     | GLTP    | KLHL13   | MTSS1L | PCDH9   | RASA3    | SMOX      | TNR      |         |
| A1854517                                         | CAV2     | DSCAM    | GM13889 | KLHL5    | MYO10  | PCDHB9  | RCN1     | SNAP91    | TOX3     |         |
| ALCAM                                            | CCDC114  | DSCAML1  | GM2A    | LAPTM4B  | MYO5A  | PCMTD2  | REV3L    | SNX1      | TPM1     |         |
| AMPD3                                            | CCDC88A  | DYNLT3   | GNB4    | LBH      | MYT1   | PCSK1N  | RGCC     | SNX22     | TRAF4    |         |
| AMZ1                                             | CCND1    | EDNRB    | GNG3    | LGALS1   | NACC2  | PDE2A   | RHOC     | SORCS1    | TRIB2    |         |
| ANKRD11                                          | CD9      | EHD3     | GNPTG   | LHFPL3   | NAP1L5 | PDGFRA  | RLBP1    | SORCS3    | TRIL     |         |
| ANKS1B                                           | CDH11    | EMID1    | GPC5    | LIMD1    | NAV1   | PGP     | RNF144A  | SOX10     | TRIO     |         |
| APLP2                                            | CDK14    | ENHO     | GPCPD1  | LINGO3   | NBEA   | PHACTR3 | RSU1     | SOX6      | TSC22D1  |         |
| ARHGAP31                                         | CDO1     | EPAS1    | GPLD1   | LMCD1    | NCALD  | PHLDA1  | RTKN     | SOX8      | TSPAN13  |         |
| ARL2BP                                           | CERS4    | EPDR1    | GPNMB   | LNK1     | NCEH1  | PHLDB1  | RUNX1T1  | SPON1     | TSPAN3   |         |
| ARNT2                                            | CHADL    | EPN2     | GPR37L1 | LRP1     | NDRG4  | PIANP   | S100A1   | SPRED1    | TSPAN6   |         |
| ARSB                                             | CHL1     | EPS8     | GPRASP1 | LRRC4B   | NELL2  | PID1    | S100A13  | SPRY1     | TSPYL4   |         |
| ARXES1                                           | CHPT1    | ETV4     | GPSM2   | LRRC4C   | NEU4   | PLLP    | S100A16  | SPRY4     | TTR      |         |
| ARXES2                                           | CHRNA4   | ETV5     | GPT2    | LRRC8D   | NFATC2 | PLXNB3  | SCG5     | SSTR1     | TXNDC16  |         |
| ASCL1                                            | CHST11   | FABP7    | GRIA3   | LRRFIP1  | NKX2-2 | PNLIP   | SCN3A    | ST8SIA3   | UGDH     |         |

Table S3. Categorized oligodendrocyte associated genes [identified in (29, 30, and 38)].

| Committed Oligodendrocyte Progenitor Associated Genes |          | Newly Formed Oligodendrocyte Associated Genes | Mature Oligodendrocyte Associated Genes |
|-------------------------------------------------------|----------|-----------------------------------------------|-----------------------------------------|
| 1810041L15RIK                                         | PFN2     | CNKS3                                         | 2700046A07RIK                           |
| 2510003E04RIK                                         | PHYHPL   | GM26834                                       | CDKN1C                                  |
| 2810468N07RIK                                         | PPFIBP1  | H2-AB1                                        | DOCK5                                   |
| 3110035E14RIK                                         | RINL     | IL23A                                         | KLK6                                    |
| ABTB2                                                 | S100A1   | ITPR2                                         | NINJ2                                   |
| ARSB                                                  | S100B    | RRAS2                                         | NKX2-9                                  |
| BCAS1                                                 | SEZ6L    | SEMA4D                                        | RAB37                                   |
| BMP4                                                  | SIRT2    | TMEM163                                       |                                         |
| BRCA1                                                 | SLC1A1   | TMEM2                                         |                                         |
| CD9                                                   | SLC22A23 |                                               |                                         |
| CDK14                                                 | SLC27A3  |                                               |                                         |
| CHD3                                                  | SLC44A1  |                                               |                                         |
| CHN2                                                  | SUSD5    |                                               |                                         |
| CNP                                                   | TIMP4    |                                               |                                         |
| CYFIP2                                                | TNR      |                                               |                                         |
| CYP2J6                                                | TNS3     |                                               |                                         |
| DYNLL1                                                | TRIO     |                                               |                                         |
| DYNLL2                                                | USP16    |                                               |                                         |
| EDIL3                                                 | WASF1    |                                               |                                         |
| ENPP6                                                 | ZFP365   |                                               |                                         |
| EPB41L2                                               |          |                                               |                                         |
| FYN                                                   |          |                                               |                                         |
| GPR17                                                 |          |                                               |                                         |
| ITPR2                                                 |          |                                               |                                         |
| KAZN                                                  |          |                                               |                                         |
| LIMS2                                                 |          |                                               |                                         |
| MFSD2A                                                |          |                                               |                                         |
| MPZL1                                                 |          |                                               |                                         |
| MYCL1                                                 |          |                                               |                                         |
| MYRF                                                  |          |                                               |                                         |
| NCAM1                                                 |          |                                               |                                         |
| NEU4                                                  |          |                                               |                                         |
| NKX2-2                                                |          |                                               |                                         |
| PAK4                                                  |          |                                               |                                         |
| PDCD4                                                 |          |                                               |                                         |

Table S3. Categorized oligodendrocyte associated genes [identified in (29, 30, and 38)].

| Myelin Forming Oligodendrocyte Associated Genes |            |         |           |          |          |          |           |          |         |
|-------------------------------------------------|------------|---------|-----------|----------|----------|----------|-----------|----------|---------|
| 1700047M11RIK                                   | B3GALT5    | DESI1   | FAM214A   | IL33     | MOBP     | PLCL1    | SBF1      | STK39    | UGT8A   |
| 2210011C24RIK                                   | BCAR1      | DIP2A   | FBXO7     | INF2     | MOG      | PLEKHA1  | SCARB2    | STMN4    | UNC5B   |
| 2810468N07RIK                                   | BCAS1      | DIXDC1  | FEZ1      | JAM3     | MPP5     | PLEKHB1  | SCCPDH    | STXBP3A  | VBP1    |
| 4931406P16RIK                                   | BIN1       | DLG1    | FGFR2     | JOSD2    | MTUS1    | PLLP     | SCD2      | SYPL     | VLDLR   |
| 5031439G07RIK                                   | BIRC2      | DNAJB2  | FKBP1A    | JPH4     | MYO6     | PLP1     | SEC11C    | SYT11    | VMP1    |
| AATK                                            | BNIP3L     | DNM3    | FBNP1     | KAT2B    | MYRF     | PLXNB3   | SECISBP2L | SYTL2    | WFDC18  |
| ABCA2                                           | BPGM       | DOCK1   | FRMD8     | KAZN     | NDRG1    | PPP1R14A | SEMA6A    | TALDO1   | WNK1    |
| ABCA8A                                          | CACNB4     | DOCK10  | FRYL      | KCNA1    | NEAT1    | PPP1R16B | SEMA6D    | TJP2     | WSCD1   |
| ACAP2                                           | CAR2       | DPY19L1 | FTH1      | KCNA6    | NFASC    | PPP2R2A  | SEPTIN4   | TM7SF3   | YBX3    |
| ACOT7                                           | CARHSP1    | DPYSL2  | GAB1      | KCNJ10   | NIPA1    | PPP2R2C  | SEPTIN7   | TMBIM1   | YPEL2   |
| ADD1                                            | CCDC47     | DST     | GABARAPL2 | KCTD13   | NKAIN1   | PPP2R3A  | SERINC5   | TMCC3    | YWHAQ   |
| ADD3                                            | CCP110     | DUSP26  | GAMT      | KCTD3    | NPC1     | PRDX1    | SERPINB1A | TMEFF1   | ZDHHC20 |
| ADI1                                            | CD82       | DUSP3   | GATM      | KIF1B    | NRBP2    | PRKACB   | SEZ6L2    | TMEFF2   | ZDHHC9  |
| ADIPOR2                                         | CDC37L1    | EDIL3   | GDE1      | KIF21A   | NUDT4    | PRKCDBP  | SHROOM2   | TMEM125  | ZFP706  |
| ADO                                             | CDC42BPA   | EFCAB14 | GIT1      | KLF13    | OMG      | PRKCZ    | SIK3      | TMEM141  |         |
| AGAP1                                           | CDK19      | EFHD1   | GJB1      | KNDC1    | OPALIN   | PRNP     | SLAIN1    | TMEM151A |         |
| AGPAT4                                          | CDR2L      | EFNB3   | GJC2      | LAMP1    | OSBPL1A  | PRR18    | SLC12A2   | TMEM229A |         |
| ANK                                             | CERS2      | EIF4H   | GJC3      | LAP3     | OTUD7B   | PRR5L    | SLC20A2   | TMEM30A  |         |
| ANK3                                            | CFL2       | ELAVL3  | GLOD4     | LEPREL4  | OXR1     | PSAT1    | SLC24A2   | TMEM63A  |         |
| ANKIB1                                          | CHN2       | ELOVL1  | GLRB      | LGI3     | PACS2    | PTGDS    | SLC2A1    | TMEM88B  |         |
| ANLN                                            | CLDN11     | ELOVL7  | GLTP      | LIMCH1   | PAFAH1B1 | PTP4A1   | SLC38A2   | TMEM9B   |         |
| ANO4                                            | CLIC4      | EMC10   | GLUL      | LITAF    | PAK1     | PTPRD    | SLC44A1   | TMOD2    |         |
| APBB1                                           | CLMN       | EML1    | GNAI1     | LPAR1    | PCBP4    | QDPR     | SLC48A1   | TNFAIP6  |         |
| APLP1                                           | CMTM5      | ENDOD1  | GNG11     | LPGAT1   | PCDH9    | QK       | SLC4A2    | TPD52    |         |
| APOD                                            | CNP        | ENPP2   | GOLGA7    | MAG      | PCNP     | RALGDS   | SLC6A6    | TPPP     |         |
| APP                                             | CNTN2      | ENPP4   | GPM6B     | MAL      | PDCD6IP  | RAP1A    | SLC6A9    | TPPP3    |         |
| ARAP2                                           | CPD        | EPB41L3 | GPR37     | MAP1A    | PDE4B    | RCBTB1   | SLCO3A1   | TPST1    |         |
| ARC                                             | CPM        | EPHB1   | GPX4      | MAP6D1   | PDLIM2   | REEP3    | SLK       | TRF      |         |
| ARHGAP23                                        | CPOX       | EPS15   | GRB14     | MAP7     | PEA15A   | REEP5    | SMAD7     | TRIM59   |         |
| ARID4B                                          | CRYAB      | ERBB2IP | GRM3      | MAP7D1   | PEX5L    | RHOG     | SMIM15    | TSC22D4  |         |
| ARPC1A                                          | CSRP1      | ERMN    | GSN       | MAPK8IP1 | PHGDH    | RHOU     | SNAPIN    | TSPAN2   |         |
| ARRDC3                                          | D1ERTD622E | ETV1    | HAPLN2    | MAPT     | PHLDB1   | RNF13    | SNX33     | TTL7     |         |
| ARSG                                            | DBNDD2     | EVI2A   | HDAC11    | MAST4    | PHLPP1   | RNF130   | SORT1     | TTYH2    |         |
| ASPA                                            | DDR1       | FA2H    | HHIP      | MBNL2    | PHYHIP1  | RNF7     | SOX2OT    | TUBB4A   |         |
| ATP1B3                                          | DEB1       | FAM134B | HSP90AA1  | MBP      | PIM3     | RTKN     | SPOCK3    | TULP4    |         |
| ATP6AP2                                         | DEGS1      | FAM171B | HSPA1A    | MCAM     | PIP4K2A  | RTN4     | SPSB1     | TYRO3    |         |
| ATP8A1                                          | DENND5A    | FAM174A | HSPA1B    | MID1IP1  | PLA2G16  | S1PR5    | SRCIN1    | UBL3     |         |



Supplementary Tables Legends:

Supplemental Table S1: Microglia associated genes [identified in (29-33)] (S1A). Categorized microglia homeostatic genes [identified in (35 and 37)] (S1B). Categorized microglia neurodegenerative genes as identified in studies by [identified in (35-37)] (S1C).

Supplemental Table S2: Categorized astrocyte associated genes [identified in (76)].

Supplemental Table S3: Categorized oligodendrocyte lineage cell associated genes [identified in (29, 30, and 38)].
